# Supplementary material for: 2-Aryl-3-(arylideneamino)-1,2-dihydroquinazoline-4(3H)-ones as inhibitors of cholinesterases and self-induced β-amyloid (Aβ) aggregation: biological evaluations and mechanistic insights from molecular dynamics simulations
Source: PubMed Central journal article supplement — RSC Adv. 2018 Feb 19;8(14):7818–31. doi: 10.1039/c7ra11872d (PMC9078462; doi:10.1039/c7ra11872d), 2018-02-19
Supplement: RA-008-C7RA11872D-s001.pdf [file RA-008-C7RA11872D-s001.pdf]

## Supplementary Data

|                |     |                                                                                                                                                                                                                                                                                                     |
|----------------|-----|-----------------------------------------------------------------------------------------------------------------------------------------------------------------------------------------------------------------------------------------------------------------------------------------------------|
| Figure caption | S1  | RMSD versus MD simulation time (30 ns) of AChE and BuChE-ligand complexes. The conformation was recorded every 2 fs. RMSD values were calculated by comparing each of those conformations with the original conformation.                                                                           |
|                | S2  | RMSD versus MD simulation time (30 ns) of A $\beta_{1-40}$ peptide free dimer and A $\beta_{1-40}$ peptide dimer-ligand complexes at sites I and II. The conformation was recorded every 2 fs. RMSD values were calculated by comparing each of those conformations with the original conformation. |
|                | S3  | 3D representations of initial minimised A $\beta_{1-40}$ peptide dimer structure without ligand (left) and final 30 ns of MD simulations without ligand (right).                                                                                                                                    |
| Table caption  | S1  | Contributions of various energy components to the binding free energy (kcal mol <sup>-1</sup> ) of AChE-Compound 2 complex (26–30 ns).                                                                                                                                                              |
|                | S2  | Contributions of various energy components to the binding free energy (kcal mol <sup>-1</sup> ) of AChE-Tacrine complex (26–30 ns).                                                                                                                                                                 |
|                | S3  | Contributions of various energy components to the binding free energy (kcal mol <sup>-1</sup> ) of BuChE-Compound 2 complex (26–30 ns).                                                                                                                                                             |
|                | S4  | Contributions of various energy components to the binding free energy (kcal mol <sup>-1</sup> ) of BuChE-Tacrine complex (26–30 ns).                                                                                                                                                                |
|                | S5  | Docking study of compound 2 with the NMR structure of an A $\beta_{1-40}$ (PDB ID: 2LMN). Number of distinct conformational clusters found = 28, out of 100 runs, using rmsd-tolerance of 2.0 Å for amyloidogenic sites I and II.                                                                   |
|                | S6  | Docking study of myricetin with the NMR structure of an A $\beta_{1-40}$ (PDB ID: 2LMN). Number of distinct conformational clusters found = 22, out of 100 runs, using rmsd-tolerance of 2.0 Å for amyloidogenic sites I and II.                                                                    |
|                | S7  | Contributions of various energy components to the binding free energy (kcal mol <sup>-1</sup> ) of A $\beta_{1-40}$ peptide dimer-compound 2 complex at Site I (20–25 ns).                                                                                                                          |
|                | S8  | Contributions of various energy components to the binding free energy (kcal mol <sup>-1</sup> ) of A $\beta_{1-40}$ peptide dimer-myricetin complex at Site I (26–30 ns).                                                                                                                           |
|                | S9  | Contributions of various energy components to the binding free energy (kcal mol <sup>-1</sup> ) of A $\beta_{1-40}$ peptide dimer-compound 2 complex at Site II (15–20 ns).                                                                                                                         |
|                | S10 | Contributions of various energy components to the binding free energy (kcal mol <sup>-1</sup> ) of A $\beta_{1-40}$ peptide dimer-myricetin complex at Site II (26–30 ns).                                                                                                                          |
|                | S11 | The interchain (chains A and B) binding free energy (kcal mol <sup>-1</sup> ) of A $\beta_{1-40}$ peptide free dimer (26–30 ns).                                                                                                                                                                    |
|                | S12 | The interchain (chains A and B) binding free energy (kcal mol <sup>-1</sup> ) of A $\beta_{1-40}$ peptide dimer-compound 2 complex at Site I (20–25 ns).                                                                                                                                            |

- S13 The interchain (chains A and B) binding free energy ( $\text{kcal mol}^{-1}$ ) of  $\text{A}\beta_{1-40}$  peptide dimer-myricetin complex at Site I (26–30 ns).
- S14 The interchain (chains A and B) binding free energy ( $\text{kcal mol}^{-1}$ ) of  $\text{A}\beta_{1-40}$  peptide dimer-compound 2 complex at Site II (15–20 ns).
- S15 The interchain (chains A and B) binding free energy ( $\text{kcal mol}^{-1}$ ) of  $\text{A}\beta_{1-40}$  peptide dimer-myricetin complex at Site II (26–30 ns).

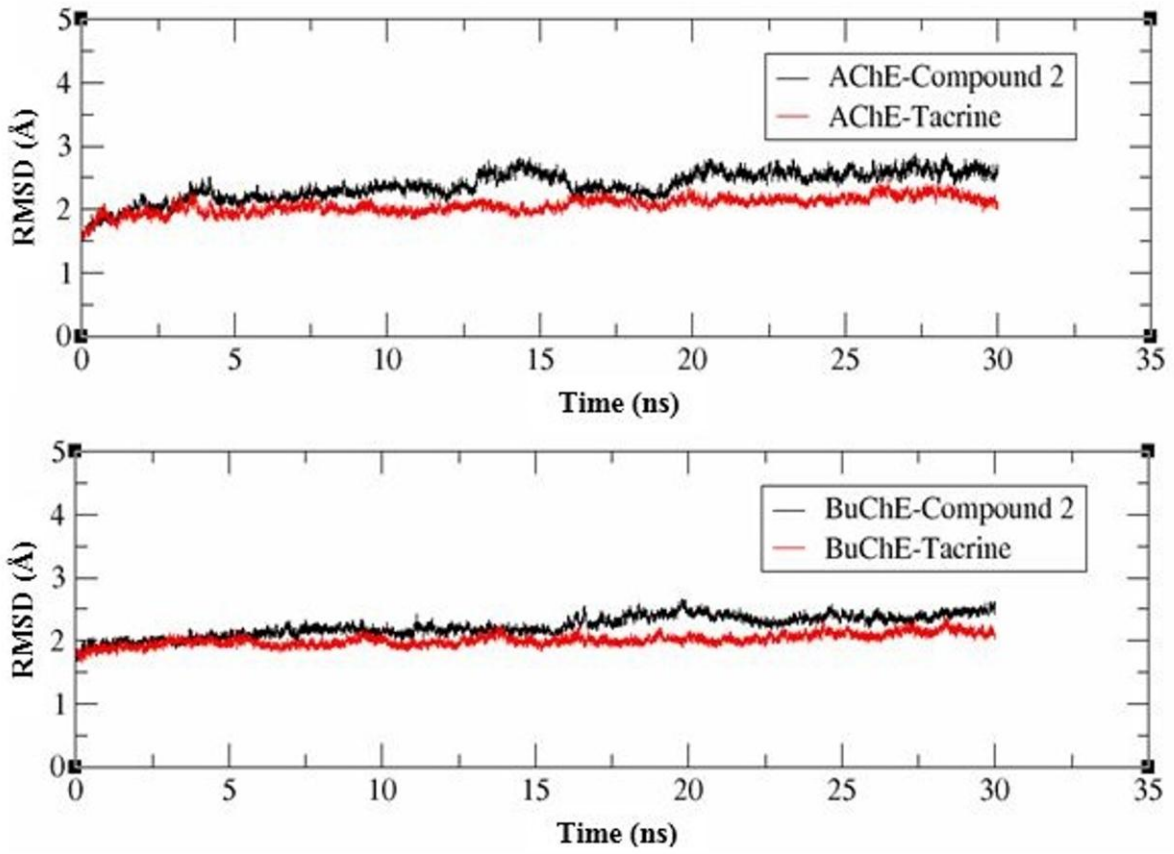

Figure S1

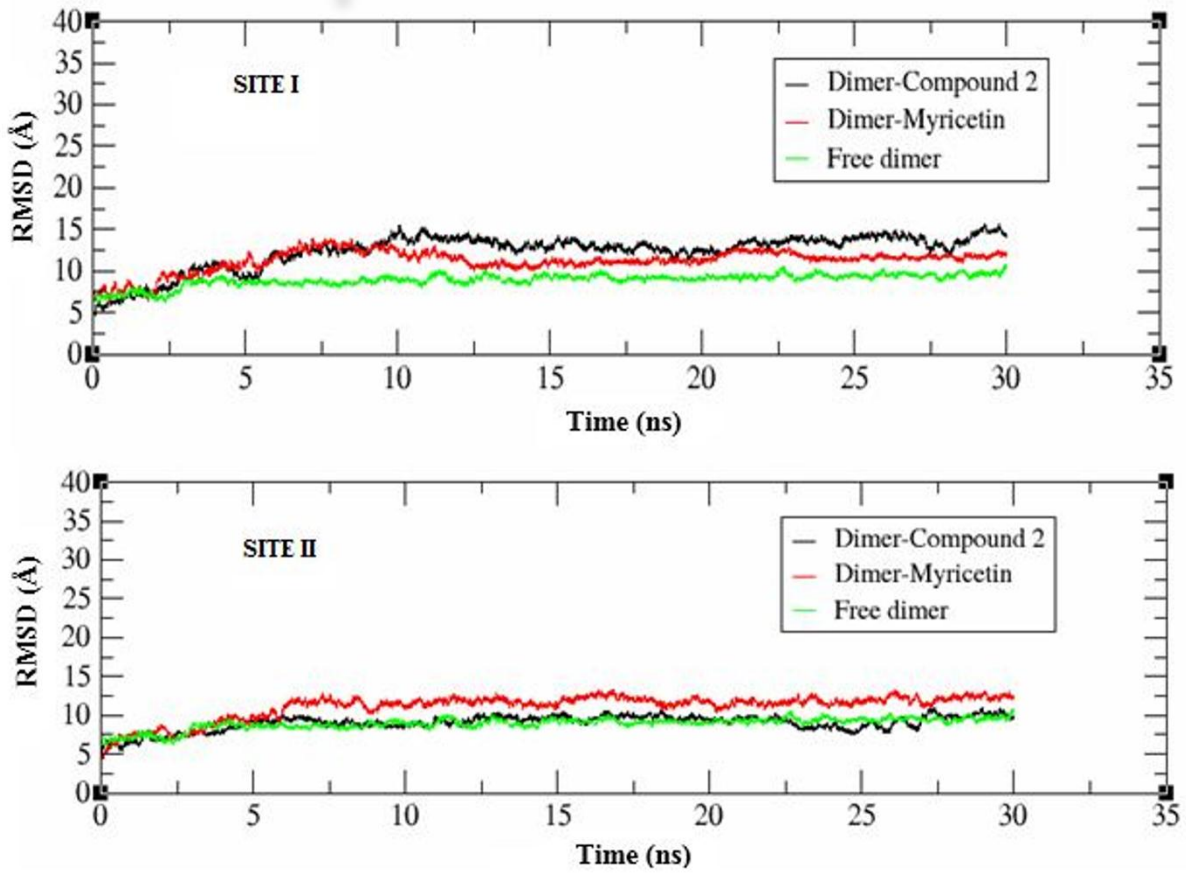

Figure S2

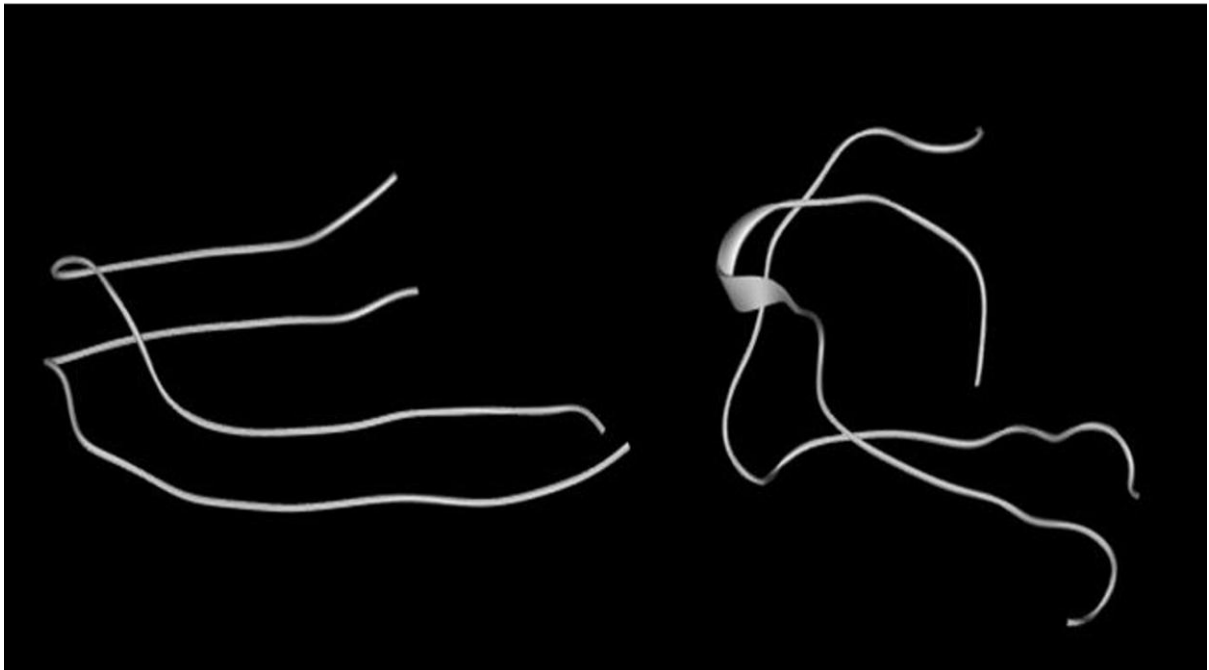

Figure S3

Table S1

| PARAMETER | COMPLEX   |       | RECEPTOR  |       | LIGAND |      | DELTA  |      |
|-----------|-----------|-------|-----------|-------|--------|------|--------|------|
|           | MEAN      | STD   | MEAN      | STD   | MEAN   | STD  | MEAN   | STD  |
| ELE       | -17224.42 | 68.64 | -17182.16 | 68.35 | -21.74 | 0.67 | -20.53 | 2.76 |
| VDW       | -2524.49  | 34.04 | -2491.67  | 33.96 | 14.93  | 1.69 | -47.75 | 2.37 |
| INT       | 15074.78  | 63.50 | 15035.66  | 63.73 | 39.12  | 4.80 | 0.00   | 0.00 |
| GAS       | -4674.13  | 90.26 | -4638.16  | 89.90 | 32.31  | 4.70 | -68.28 | 3.16 |
| PBSUR     | 146.89    | 1.16  | 149.43    | 1.17  | 4.65   | 0.05 | -7.19  | 0.10 |
| PBCAL     | -4741.80  | 60.04 | -4776.37  | 60.64 | -27.69 | 0.51 | 62.25  | 5.12 |
| PBSOL     | -4594.91  | 59.39 | -4626.93  | 60.00 | -23.04 | 0.51 | 55.07  | 5.13 |
| PBELE     | -21966.22 | 43.01 | -21958.52 | 42.80 | -49.43 | 0.62 | 41.73  | 5.55 |
| PBTOT     | -9269.03  | 71.40 | -9265.09  | 70.95 | 9.27   | 4.71 | -13.21 | 5.09 |
| GBSUR     | 104.91    | 1.24  | 106.77    | 1.23  | 2.54   | 0.03 | -4.41  | 0.11 |
| GB        | -5015.12  | 59.41 | -5028.91  | 59.26 | -30.32 | 0.57 | 44.11  | 2.24 |
| GBSOL     | -4910.21  | 58.89 | -4922.14  | 58.73 | -27.78 | 0.56 | 39.71  | 2.20 |
| GBELE     | -22239.54 | 35.54 | -22211.07 | 35.51 | -52.06 | 0.53 | 23.59  | 1.53 |
| GBTOT     | -9584.34  | 66.42 | -9560.30  | 66.23 | 4.53   | 4.72 | -28.57 | 2.25 |

Table S2

| PARAMETER | COMPLEX   |       | RECEPTOR  |       | LIGAND |      | DELTA   |       |
|-----------|-----------|-------|-----------|-------|--------|------|---------|-------|
|           | MEAN      | STD   | MEAN      | STD   | MEAN   | STD  | MEAN    | STD   |
| ELE       | -17412.69 | 85.74 | -17163.06 | 85.47 | 14.70  | 0.47 | -264.34 | 11.94 |
| VDW       | -2503.88  | 34.67 | -2485.36  | 34.58 | 10.87  | 1.19 | -29.39  | 1.75  |
| INT       | 15045.84  | 68.54 | 15010.93  | 68.51 | 34.91  | 3.74 | -0.00   | 0.00  |
| GAS       | -4870.73  | 97.34 | -4637.48  | 96.99 | 60.48  | 3.61 | -293.73 | 12.00 |
| PBSUR     | 147.62    | 1.16  | 148.70    | 1.17  | 3.04   | 0.02 | -4.11   | 0.09  |
| PBCAL     | -4631.68  | 70.72 | -4841.46  | 69.90 | -60.94 | 0.45 | 270.73  | 10.58 |
| PBSOL     | -4484.05  | 70.15 | -4692.76  | 69.32 | -57.91 | 0.45 | 266.62  | 10.61 |
| PBELE     | -22044.37 | 42.81 | -22004.52 | 42.52 | -46.24 | 0.44 | 6.39    | 4.84  |
| PBTOT     | -9354.79  | 69.46 | -9330.25  | 69.35 | 2.57   | 3.58 | -27.11  | 4.67  |
| GBSUR     | 105.28    | 1.23  | 106.04    | 1.22  | 1.44   | 0.01 | -2.20   | 0.07  |
| GB        | -4876.48  | 69.28 | -5087.54  | 69.11 | -60.15 | 0.57 | 271.21  | 9.43  |
| GBSOL     | -4771.20  | 68.85 | -4981.49  | 68.71 | -58.72 | 0.57 | 269.01  | 9.39  |
| GBELE     | -22289.17 | 36.60 | -22250.60 | 36.58 | -45.45 | 0.61 | 6.88    | 3.25  |
| GBTOT     | -9641.93  | 67.35 | -9618.98  | 67.38 | 1.76   | 3.57 | -24.72  | 3.19  |

Table S3

| PARAMETER | COMPLEX   |       | RECEPTOR  |       | LIGAND |      | DELTA  |      |
|-----------|-----------|-------|-----------|-------|--------|------|--------|------|
|           | MEAN      | STD   | MEAN      | STD   | MEAN   | STD  | MEAN   | STD  |
| ELE       | -15026.67 | 77.59 | -14995.66 | 77.55 | -26.64 | 1.33 | -4.37  | 2.97 |
| VDW       | -2492.60  | 35.87 | -2459.98  | 35.73 | 14.62  | 1.82 | -47.25 | 2.49 |
| INT       | 15307.41  | 67.16 | 15267.22  | 66.98 | 40.19  | 4.89 | 0.00   | 0.00 |
| GAS       | -2211.86  | 95.41 | -2188.42  | 95.20 | 28.17  | 5.05 | -51.62 | 4.10 |
| PBSUR     | 151.51    | 1.05  | 153.77    | 1.06  | 4.60   | 0.05 | -6.85  | 0.12 |
| PBCAL     | -5516.83  | 65.44 | -5528.31  | 65.63 | -26.82 | 0.98 | 38.30  | 4.77 |
| PBSOL     | -5365.31  | 65.35 | -5374.54  | 65.56 | -22.22 | 0.99 | 31.45  | 4.76 |
| PBELE     | -20543.49 | 39.81 | -20523.97 | 39.31 | -53.46 | 0.99 | 33.93  | 3.81 |
| PBTOT     | -7577.17  | 66.43 | -7562.96  | 65.70 | 5.95   | 4.86 | -20.17 | 3.97 |
| GBSUR     | 100.10    | 1.31  | 101.71    | 1.34  | 2.52   | 0.02 | -4.13  | 0.14 |
| GB        | -5767.87  | 65.08 | -5768.03  | 65.05 | -29.27 | 0.91 | 29.42  | 2.98 |
| GBSOL     | -5667.77  | 64.92 | -5666.32  | 64.88 | -26.75 | 0.91 | 25.30  | 2.92 |
| GBELE     | -20794.54 | 35.03 | -20763.69 | 35.02 | -55.90 | 0.89 | 25.05  | 1.40 |
| GBTOT     | -7879.63  | 65.06 | -7854.74  | 64.69 | 1.43   | 4.92 | -26.32 | 2.36 |

Table S4

| PARAMETER | COMPLEX   |        | RECEPTOR  |       | LIGAND |      | DELTA   |      |
|-----------|-----------|--------|-----------|-------|--------|------|---------|------|
|           | MEAN      | STD    | MEAN      | STD   | MEAN   | STD  | MEAN    | STD  |
| ELE       | -15086.80 | 83.92  | -14988.21 | 84.92 | 14.65  | 0.48 | -113.23 | 9.55 |
| VDW       | -2503.23  | 34.38  | -2485.87  | 34.43 | 10.91  | 1.22 | -28.27  | 2.08 |
| INT       | 15298.30  | 66.01  | 15263.26  | 65.78 | 35.04  | 3.98 | -0.00   | 0.00 |
| GAS       | -2291.73  | 100.27 | -2210.82  | 99.97 | 60.59  | 3.96 | -141.50 | 9.78 |
| PBSUR     | 150.88    | 1.13   | 152.03    | 1.13  | 3.04   | 0.02 | -4.19   | 0.10 |
| PBCAL     | -5498.83  | 70.62  | -5557.15  | 71.46 | -60.84 | 0.46 | 119.17  | 6.86 |
| PBSOL     | -5347.94  | 70.23  | -5405.12  | 71.07 | -57.80 | 0.46 | 114.98  | 6.85 |
| PBELE     | -20585.62 | 39.13  | -20545.36 | 39.04 | -46.19 | 0.44 | 5.94    | 5.02 |
| PBTOT     | -7639.67  | 66.68  | -7615.94  | 66.04 | 2.79   | 3.89 | -26.52  | 5.32 |
| GBSUR     | 98.22     | 1.38   | 98.89     | 1.36  | 1.44   | 0.01 | -2.10   | 0.08 |
| GB        | -5709.25  | 72.34  | -5772.39  | 73.48 | -60.01 | 0.56 | 123.15  | 7.41 |
| GBSOL     | -5611.03  | 71.87  | -5673.50  | 73.07 | -58.57 | 0.56 | 121.04  | 7.40 |
| GBELE     | -20796.05 | 34.20  | -20760.60 | 34.10 | -45.36 | 0.66 | 9.91    | 3.20 |
| GBTOT     | -7902.76  | 65.80  | -7884.32  | 65.32 | 2.02   | 3.93 | -20.46  | 3.52 |

Table S5

| Cluster Rank | Lowest Binding Energy | Run | Mean Binding Energy | Num in Clus | Histogram                                                             |    |
|--------------|-----------------------|-----|---------------------|-------------|-----------------------------------------------------------------------|----|
|              |                       |     |                     |             | 5                                                                     | 10 |
| 1            | -5.97                 | 27  | -5.69               | 24          | ##### A(16-21)<br>AMYLOIDOGENIC REGION 1<br>(SITE I:[Chain A(16-21)]) |    |
| 2            | -5.41                 | 55  | -4.95               | 13          | #####A(16-21)                                                         |    |
| 3            | -5.07                 | 61  | -4.79               | 6           | #####AB(16-21)                                                        |    |
| 4            | -5.06                 | 51  | -4.71               | 2           | ##A(16-21)                                                            |    |
| 5            | -5.06                 | 86  | -4.98               | 8           | #####A(16-21)                                                         |    |
| 6            | -5.03                 | 14  | -4.57               | 2           | ##A(16-21)                                                            |    |
| 7            | -4.99                 | 48  | -4.65               | 2           | ##A(16-21)                                                            |    |
| 8            | -4.98                 | 39  | -4.90               | 3           | ##A(16-21)                                                            |    |
| 9            | -4.92                 | 21  | -4.92               | 1           | #A(16-21)                                                             |    |
| 10           | -4.90                 | 78  | -4.67               | 2           | ##A(16-21)                                                            |    |
| 11           | -4.83                 | 95  | -4.83               | 1           | #A(16-21)                                                             |    |
| 12           | -4.71                 | 73  | -4.71               | 1           | # B(32-36)<br>AMYLOIDOGENIC REGION 2<br>(SITE II:[Chain B(32-36)])    |    |
| 13           | -4.66                 | 20  | -4.66               | 1           | #                                                                     |    |
| 14           | -4.64                 | 2   | -4.64               | 1           | #                                                                     |    |
| 15           | -4.61                 | 65  | -4.46               | 3           | ###                                                                   |    |
| 16           | -4.60                 | 96  | -4.35               | 3           | ###                                                                   |    |
| 17           | -4.57                 | 10  | -4.30               | 12          | #####                                                                 |    |
| 18           | -4.51                 | 23  | -4.51               | 1           | #                                                                     |    |
| 19           | -4.31                 | 7   | -4.31               | 1           | #                                                                     |    |
| 20           | -4.10                 | 97  | -4.06               | 4           | ####                                                                  |    |
| 21           | -4.00                 | 43  | -4.00               | 1           | #                                                                     |    |
| 22           | -3.99                 | 4   | -3.99               | 1           | #                                                                     |    |
| 23           | -3.95                 | 69  | -3.95               | 1           | #                                                                     |    |
| 24           | -3.94                 | 91  | -3.93               | 2           | ##                                                                    |    |
| 25           | -3.88                 | 99  | -3.88               | 1           | #                                                                     |    |
| 26           | -3.85                 | 56  | -3.85               | 1           | #                                                                     |    |
| 27           | -3.79                 | 17  | -3.79               | 1           | #                                                                     |    |
| 28           | -3.59                 | 19  | -3.59               | 1           | #                                                                     |    |

Table S6

| Cluster Rank | Lowest Binding Energy | Run | Mean Binding Energy | Num in Clus | Histogram                                            |    |    |    |    |    |    |
|--------------|-----------------------|-----|---------------------|-------------|------------------------------------------------------|----|----|----|----|----|----|
|              |                       |     |                     |             | 5                                                    | 10 | 15 | 20 | 25 | 30 | 35 |
| 1            | -3.95                 | 30  | -3.64               | 7           | #####                                                |    |    |    |    |    |    |
| 2            | -3.92                 | 20  | -3.49               | 11          | #####                                                |    |    |    |    |    |    |
| 3            | -3.90                 | 22  | -3.90               | 1           | #                                                    |    |    |    |    |    |    |
| 4            | -3.89                 | 28  | -3.58               | 29          | ##### A(16-21)                                       |    |    |    |    |    |    |
|              |                       |     |                     |             | AMYLOIDOGENIC REGION 1<br>(SITE I):[Chain A(16-21)]  |    |    |    |    |    |    |
| 5            | -3.80                 | 97  | -3.80               | 1           | #                                                    |    |    |    |    |    |    |
| 6            | -3.73                 | 89  | -3.66               | 4           | ####                                                 |    |    |    |    |    |    |
| 7            | -3.66                 | 70  | -3.65               | 3           | ### B(32-36)                                         |    |    |    |    |    |    |
|              |                       |     |                     |             | AMYLOIDOGENIC REGION 2<br>(SITE II):[Chain B(32-36)] |    |    |    |    |    |    |
| 8            | -3.66                 | 54  | -3.48               | 2           | ##                                                   |    |    |    |    |    |    |
| 9            | -3.58                 | 64  | -3.47               | 19          | #####                                                |    |    |    |    |    |    |
| 10           | -3.56                 | 47  | -3.41               | 4           | ####                                                 |    |    |    |    |    |    |
| 11           | -3.52                 | 79  | -3.50               | 2           | ##                                                   |    |    |    |    |    |    |
| 12           | -3.49                 | 16  | -3.49               | 1           | #                                                    |    |    |    |    |    |    |
| 13           | -3.46                 | 88  | -3.43               | 2           | ##                                                   |    |    |    |    |    |    |
| 14           | -3.44                 | 81  | -3.42               | 2           | ##                                                   |    |    |    |    |    |    |
| 15           | -3.27                 | 69  | -3.27               | 1           | #                                                    |    |    |    |    |    |    |
| 16           | -3.26                 | 78  | -3.17               | 3           | ###                                                  |    |    |    |    |    |    |
| 17           | -3.25                 | 35  | -3.25               | 1           | #                                                    |    |    |    |    |    |    |
| 18           | -3.14                 | 37  | -3.10               | 2           | ##                                                   |    |    |    |    |    |    |
| 19           | -3.02                 | 63  | -3.02               | 1           | #                                                    |    |    |    |    |    |    |
| 20           | -2.68                 | 40  | -2.68               | 1           | #                                                    |    |    |    |    |    |    |
| 21           | -2.61                 | 41  | -2.59               | 2           | ##                                                   |    |    |    |    |    |    |
| 22           | -2.59                 | 75  | -2.59               | 1           | #                                                    |    |    |    |    |    |    |

Table S7

| PARAMETER | COMPLEX  |       | RECEPTOR |       | LIGAND |      | DELTA  |      |
|-----------|----------|-------|----------|-------|--------|------|--------|------|
|           | MEAN     | STD   | MEAN     | STD   | MEAN   | STD  | MEAN   | STD  |
| ELE       | -998.15  | 32.40 | -960.95  | 31.53 | -28.01 | 1.32 | -9.18  | 3.25 |
| VDW       | -100.61  | 11.05 | -80.32   | 10.84 | 14.54  | 1.62 | -34.83 | 2.46 |
| INT       | 1729.48  | 24.24 | 1691.43  | 23.32 | 38.05  | 4.85 | 0.00   | 0.00 |
| GAS       | 630.72   | 38.86 | 650.16   | 38.16 | 24.57  | 4.93 | -44.01 | 4.31 |
| PBSUR     | 44.89    | 0.92  | 45.62    | 0.99  | 4.75   | 0.05 | -5.47  | 0.22 |
| PBCAL     | -1265.27 | 32.15 | -1256.27 | 31.51 | -33.91 | 0.97 | 24.92  | 3.47 |
| PBSOL     | -1220.37 | 31.95 | -1210.65 | 31.28 | -29.17 | 0.97 | 19.45  | 3.37 |
| PBELE     | -2263.42 | 12.53 | -2217.22 | 11.94 | -61.93 | 0.91 | 15.73  | 2.57 |
| PBTOT     | -589.65  | 24.30 | -560.49  | 23.64 | -4.60  | 4.77 | -24.56 | 2.73 |
| GBSUR     | 28.60    | 0.56  | 29.38    | 0.56  | 2.64   | 0.03 | -3.42  | 0.17 |
| GB        | -1307.34 | 31.14 | -1293.68 | 30.28 | -37.04 | 0.99 | 23.38  | 3.60 |
| GBSOL     | -1278.74 | 30.97 | -1264.30 | 30.10 | -34.40 | 0.98 | 19.96  | 3.56 |
| GBELE     | -2305.49 | 10.13 | -2254.63 | 10.04 | -65.05 | 0.77 | 14.19  | 1.14 |
| GBTOT     | -648.02  | 24.42 | -614.14  | 23.71 | -9.83  | 4.82 | -24.05 | 2.26 |

Table S8

| PARAMETER | COMPLEX  |       | RECEPTOR |       | LIGAND |      | DELTA  |      |
|-----------|----------|-------|----------|-------|--------|------|--------|------|
|           | MEAN     | STD   | MEAN     | STD   | MEAN   | STD  | MEAN   | STD  |
| ELE       | -984.59  | 29.08 | -887.98  | 28.91 | -37.92 | 2.04 | -58.68 | 5.11 |
| VDW       | -130.27  | 13.65 | -118.05  | 12.79 | 20.74  | 2.42 | -32.97 | 3.98 |
| INT       | 1729.84  | 23.06 | 1691.77  | 22.44 | 38.07  | 4.53 | -0.00  | 0.00 |
| GAS       | 614.98   | 34.54 | 685.74   | 33.89 | 20.89  | 4.41 | -91.65 | 4.72 |
| PBSUR     | 37.26    | 1.26  | 38.61    | 1.30  | 3.43   | 0.02 | -4.78  | 0.10 |
| PBCAL     | -1259.39 | 25.82 | -1284.20 | 25.91 | -45.55 | 1.34 | 70.36  | 3.42 |
| PBSOL     | -1222.13 | 25.66 | -1245.59 | 25.78 | -42.12 | 1.34 | 65.58  | 3.42 |
| PBELE     | -2243.97 | 13.82 | -2172.18 | 12.60 | -83.47 | 1.26 | 11.68  | 4.40 |
| PBTOT     | -607.14  | 23.55 | -559.85  | 22.88 | -21.23 | 4.17 | -26.07 | 3.67 |
| GBSUR     | 23.77    | 0.88  | 25.25    | 0.92  | 2.03   | 0.01 | -3.51  | 0.13 |
| GB        | -1305.73 | 25.77 | -1326.73 | 25.87 | -50.44 | 1.62 | 71.44  | 3.25 |
| GBSOL     | -1281.96 | 25.81 | -1301.48 | 25.90 | -48.41 | 1.62 | 67.93  | 3.21 |
| GBELE     | -2290.31 | 10.13 | -2214.71 | 9.53  | -88.36 | 1.21 | 12.76  | 3.29 |
| GBTOT     | -666.97  | 23.11 | -615.74  | 22.63 | -27.52 | 4.34 | -23.72 | 3.17 |

Table S9

| PARAMETER | COMPLEX  |       | RECEPTOR |       | LIGAND |      | DELTA  |      |
|-----------|----------|-------|----------|-------|--------|------|--------|------|
|           | MEAN     | STD   | MEAN     | STD   | MEAN   | STD  | MEAN   | STD  |
| ELE       | -1116.43 | 28.44 | -1106.53 | 26.94 | -5.78  | 1.79 | -4.11  | 3.92 |
| VDW       | -118.95  | 13.62 | -113.24  | 14.44 | 14.09  | 1.65 | -19.80 | 2.56 |
| INT       | 1727.68  | 23.22 | 1688.69  | 23.14 | 38.99  | 4.85 | -0.00  | 0.00 |
| GAS       | 492.30   | 36.81 | 468.92   | 36.13 | 47.30  | 5.05 | -23.91 | 4.22 |
| PBSUR     | 42.65    | 0.89  | 41.55    | 1.05  | 4.76   | 0.04 | -3.65  | 0.30 |
| PBCAL     | -1089.99 | 29.53 | -1070.30 | 28.20 | -29.14 | 1.77 | 9.45   | 4.12 |
| PBSOL     | -1047.34 | 29.03 | -1028.76 | 27.54 | -24.38 | 1.76 | 5.80   | 4.13 |
| PBELE     | -2206.42 | 12.94 | -2176.84 | 13.32 | -34.92 | 1.01 | 5.34   | 1.47 |
| PBTOT     | -555.04  | 22.15 | -559.84  | 21.79 | 22.92  | 4.86 | -18.12 | 2.21 |
| GBSUR     | 26.58    | 0.67  | 26.03    | 0.78  | 2.61   | 0.02 | -2.06  | 0.25 |
| GB        | -1141.52 | 27.71 | -1120.75 | 26.44 | -31.73 | 1.62 | 10.97  | 3.81 |
| GBSOL     | -1114.94 | 27.35 | -1094.72 | 25.98 | -29.13 | 1.61 | 8.91   | 3.84 |
| GBELE     | -2257.94 | 9.89  | -2227.29 | 10.01 | -37.51 | 0.86 | 6.86   | 0.97 |
| GBTOT     | -622.64  | 22.21 | -625.80  | 22.01 | 18.17  | 4.92 | -15.01 | 2.21 |



Table S10

| PARAMETER | COMPLEX  |       | RECEPTOR |       | LIGAND |      | DELTA  |      |
|-----------|----------|-------|----------|-------|--------|------|--------|------|
|           | MEAN     | STD   | MEAN     | STD   | MEAN   | STD  | MEAN   | STD  |
| ELE       | -1183.52 | 49.43 | -1137.29 | 49.16 | -42.96 | 3.84 | -3.26  | 3.37 |
| VDW       | -127.02  | 12.90 | -115.08  | 12.37 | 21.20  | 2.35 | -33.14 | 2.37 |
| INT       | 1735.39  | 22.44 | 1698.72  | 21.82 | 36.68  | 4.44 | -0.00  | 0.00 |
| GAS       | 424.85   | 54.42 | 446.34   | 54.16 | 14.91  | 5.55 | -36.40 | 3.83 |
| PBSUR     | 38.78    | 0.93  | 39.94    | 1.09  | 3.42   | 0.03 | -4.59  | 0.30 |
| PBCAL     | -1097.53 | 48.32 | -1075.97 | 48.34 | -42.88 | 2.86 | 21.32  | 3.61 |
| PBSOL     | -1058.76 | 47.73 | -1036.03 | 47.54 | -39.45 | 2.86 | 16.73  | 3.55 |
| PBELE     | -2281.05 | 13.46 | -2213.27 | 13.14 | -85.84 | 1.32 | 18.06  | 2.32 |
| PBTOT     | -633.91  | 24.55 | -589.69  | 23.90 | -24.54 | 4.23 | -19.67 | 2.55 |
| GBSUR     | 24.36    | 0.63  | 25.31    | 0.62  | 2.03   | 0.01 | -2.98  | 0.19 |
| GB        | -1143.08 | 45.34 | -1118.42 | 46.27 | -47.17 | 3.15 | 22.51  | 3.94 |
| GBSOL     | -1118.73 | 44.95 | -1093.11 | 45.84 | -45.14 | 3.14 | 19.53  | 3.90 |
| GBELE     | -2326.60 | 11.20 | -2255.72 | 10.67 | -90.14 | 1.24 | 19.25  | 2.18 |
| GBTOT     | -693.88  | 24.03 | -646.77  | 23.22 | -30.24 | 4.39 | -16.87 | 2.31 |

Table S11

| PARAMETER | DIMER    |       | CHAIN A  |       | CHAIN B  |       | DELTA   |       |
|-----------|----------|-------|----------|-------|----------|-------|---------|-------|
|           | MEAN     | STD   | MEAN     | STD   | MEAN     | STD   | MEAN    | STD   |
| ELE       | -1077.91 | 35.25 | -530.68  | 15.42 | -499.13  | 25.07 | -48.09  | 18.44 |
| VDW       | -115.00  | 10.94 | 3.38     | 7.60  | 8.86     | 6.81  | -127.24 | 6.20  |
| INT       | 1683.32  | 22.32 | 840.51   | 15.86 | 842.80   | 16.46 | -0.00   | 0.00  |
| GAS       | 490.41   | 38.79 | 313.22   | 21.51 | 352.53   | 27.56 | -175.34 | 20.11 |
| PBSUR     | 41.35    | 0.66  | 29.25    | 0.69  | 31.67    | 0.30  | -19.57  | 0.60  |
| PBCAL     | -1133.05 | 31.16 | -594.05  | 13.40 | -620.06  | 22.28 | 81.05   | 17.04 |
| PBSOL     | -1091.70 | 30.89 | -564.79  | 13.35 | -588.39  | 22.19 | 61.48   | 16.77 |
| PBELE     | -2210.95 | 12.01 | -1124.72 | 7.05  | -1119.19 | 6.55  | 32.96   | 6.38  |
| PBTOT     | -601.29  | 21.97 | -251.57  | 16.36 | -235.86  | 15.87 | -113.86 | 7.60  |
| GBSUR     | 25.54    | 0.46  | 17.78    | 0.40  | 19.02    | 0.19  | -11.27  | 0.44  |
| GB        | -1171.16 | 32.14 | -612.85  | 13.51 | -643.54  | 22.84 | 85.23   | 16.97 |
| GBSOL     | -1145.63 | 31.97 | -595.07  | 13.41 | -624.52  | 22.82 | 73.96   | 16.78 |
| GBELE     | -2249.07 | 9.49  | -1143.53 | 6.15  | -1142.67 | 5.79  | 37.13   | 4.80  |
| GBTOT     | -655.22  | 21.15 | -281.85  | 15.98 | -271.99  | 16.04 | -101.38 | 6.63  |

Table S12

| PARAMETER | DIMER    |       | CHAIN A  |       | CHAIN B  |       | DELTA   |       |
|-----------|----------|-------|----------|-------|----------|-------|---------|-------|
|           | MEAN     | STD   | MEAN     | STD   | MEAN     | STD   | MEAN    | STD   |
| ELE       | -960.95  | 31.53 | -434.27  | 33.76 | -500.47  | 23.06 | -26.21  | 21.87 |
| VDW       | -80.32   | 10.84 | 12.65    | 7.51  | 2.74     | 7.43  | -95.70  | 6.13  |
| INT       | 1691.43  | 23.32 | 843.07   | 15.91 | 848.36   | 16.37 | -0.00   | 0.00  |
| GAS       | 650.16   | 38.16 | 421.45   | 33.37 | 350.63   | 29.55 | -121.92 | 21.19 |
| PBSUR     | 45.62    | 0.99  | 32.01    | 0.53  | 29.87    | 0.79  | -16.26  | 0.82  |
| PBCAL     | -1256.26 | 31.51 | -679.96  | 29.67 | -622.91  | 22.64 | 46.61   | 20.81 |
| PBSOL     | -1210.64 | 31.27 | -647.95  | 29.81 | -593.03  | 22.27 | 30.35   | 20.88 |
| PBELE     | -2217.21 | 11.93 | -1114.24 | 7.64  | -1123.37 | 7.63  | 20.40   | 5.66  |
| PBTOT     | -560.48  | 23.64 | -226.50  | 16.19 | -242.41  | 16.74 | -91.57  | 6.30  |
| GBSUR     | 29.38    | 0.56  | 19.52    | 0.32  | 18.66    | 0.48  | -8.80   | 0.57  |
| GB        | -1293.68 | 30.28 | -704.35  | 30.08 | -643.90  | 22.27 | 54.58   | 20.18 |
| GBSO      | -1264.30 | 30.10 | -684.84  | 30.17 | -625.24  | 22.02 | 45.78   | 20.29 |
| GBELE     | -2254.63 | 10.04 | -1138.63 | 6.74  | -1144.37 | 6.59  | 28.37   | 4.53  |
| GBTOT     | -614.14  | 23.71 | -263.39  | 16.24 | -274.61  | 16.56 | -76.14  | 5.53  |

Table S13

| PARAMETER | DIMER    |       | CHAIN A  |       | CHAIN B  |       | DELTA   |       |
|-----------|----------|-------|----------|-------|----------|-------|---------|-------|
|           | MEAN     | STD   | MEAN     | STD   | MEAN     | STD   | MEAN    | STD   |
| ELE       | -887.98  | 28.91 | -430.82  | 17.62 | -477.85  | 18.63 | 20.69   | 23.01 |
| VDW       | -118.86  | 12.80 | -11.67   | 7.06  | 1.53     | 7.29  | -108.72 | 7.02  |
| INT       | 1691.42  | 22.31 | 848.38   | 16.13 | 843.03   | 15.48 | 0.00    | 0.00  |
| GAS       | 684.57   | 33.66 | 405.89   | 22.98 | 366.71   | 22.69 | -88.03  | 25.24 |
| PBSUR     | 38.61    | 1.30  | 27.08    | 0.56  | 29.25    | 0.86  | -17.72  | 0.85  |
| PBCAL     | -1284.21 | 25.90 | -670.75  | 14.31 | -637.98  | 15.65 | 24.52   | 21.60 |
| PBSOL     | -1245.60 | 25.77 | -643.67  | 14.32 | -608.74  | 15.81 | 6.81    | 21.44 |
| PBELE     | -2172.19 | 12.60 | -1101.57 | 7.81  | -1115.84 | 6.66  | 45.22   | 6.59  |
| PBTOT     | -561.02  | 22.81 | -237.78  | 16.61 | -242.03  | 15.48 | -81.22  | 7.81  |
| GBSUR     | 25.25    | 0.92  | 16.95    | 0.26  | 18.05    | 0.45  | -9.74   | 0.59  |
| GB        | -1326.73 | 25.87 | -694.11  | 15.13 | -659.08  | 16.56 | 26.46   | 20.73 |
| GBSOL     | -1301.48 | 25.90 | -677.16  | 15.11 | -641.03  | 16.60 | 16.72   | 20.50 |
| GBELE     | -2214.71 | 9.53  | -1124.93 | 6.30  | -1136.93 | 5.75  | 47.15   | 4.82  |
| GBTOT     | -616.91  | 22.60 | -271.27  | 16.31 | -274.32  | 15.62 | -71.31  | 8.12  |

Table S14

| PARAMETER | DIMER    |       | CHAIN A  |       | CHAIN B  |       | DELTA   |       |
|-----------|----------|-------|----------|-------|----------|-------|---------|-------|
|           | MEAN     | STD   | MEAN     | STD   | MEAN     | STD   | MEAN    | STD   |
| ELE       | -1106.53 | 26.94 | -509.88  | 18.01 | -585.78  | 14.61 | -10.87  | 17.94 |
| VDW       | -113.24  | 14.44 | 15.57    | 7.11  | 2.96     | 8.54  | -131.76 | 7.69  |
| INT       | 1688.69  | 23.14 | 842.15   | 16.12 | 846.5    | 16.05 | 0.00    | 0.00  |
| GAS       | 468.92   | 36.13 | 347.84   | 23.44 | 263.71   | 19.18 | -142.63 | 21.45 |
| PBSUR     | 41.55    | 1.05  | 32.82    | 0.40  | 29.14    | 0.61  | -20.42  | 0.85  |
| PBCAL     | -1070.37 | 28.20 | -606.96  | 15.81 | -532.78  | 12.08 | 69.37   | 20.17 |
| PBSOL     | -1028.82 | 27.54 | -574.14  | 15.62 | -503.64  | 11.91 | 48.96   | 19.69 |
| PBELE     | -2176.90 | 13.32 | -1116.85 | 6.11  | -1118.56 | 7.24  | 58.50   | 9.45  |
| PBTOT     | -559.90  | 21.79 | -226.30  | 15.46 | -239.92  | 14.92 | -93.68  | 8.38  |
| GBSUR     | 26.03    | 0.78  | 19.72    | 0.24  | 18.11    | 0.48  | -11.80  | 0.56  |
| GB        | -1120.75 | 26.44 | -631.39  | 16.79 | -552.33  | 12.88 | 62.97   | 17.51 |
| GBSOL     | -1094.72 | 25.98 | -611.67  | 16.68 | -534.22  | 12.77 | 51.16   | 17.22 |
| GBELE     | -2227.29 | 10.01 | -1141.27 | 5.69  | -1138.11 | 6.43  | 52.10   | 5.28  |
| GBTOT     | -625.80  | 22.01 | -263.83  | 15.46 | -270.51  | 15.16 | -91.47  | 6.98  |

Table S15

| PARAMETER | DIMER    |       | CHAIN A  |       | CHAIN B  |       | DELTA   |       |
|-----------|----------|-------|----------|-------|----------|-------|---------|-------|
|           | MEAN     | STD   | MEAN     | STD   | MEAN     | STD   | MEAN    | STD   |
| ELE       | -1137.29 | 49.16 | -457.79  | 14.47 | -574.44  | 43.32 | -105.06 | 20.28 |
| VDW       | -115.77  | 12.34 | -5.86    | 7.75  | -0.20    | 7.59  | -109.71 | 5.10  |
| INT       | 1697.96  | 21.92 | 850.85   | 15.76 | 847.10   | 15.66 | -0.00   | 0.00  |
| GAS       | 444.90   | 54.25 | 387.20   | 20.84 | 272.46   | 45.67 | -214.77 | 19.33 |
| PBSUR     | 39.94    | 1.09  | 28.46    | 0.74  | 28.26    | 0.49  | -16.78  | 0.37  |
| PBCAL     | -1075.99 | 48.33 | -662.32  | 12.29 | -547.60  | 40.19 | 133.93  | 17.21 |
| PBSOL     | -1036.04 | 47.52 | -633.86  | 12.02 | -519.33  | 39.98 | 117.15  | 17.20 |
| PBELE     | -2213.28 | 13.16 | -1120.11 | 6.83  | -1122.04 | 7.89  | 28.87   | 8.85  |
| PBTOT     | -591.15  | 24.13 | -246.65  | 16.04 | -246.87  | 16.52 | -97.62  | 9.09  |
| GBSUR     | 25.31    | 0.62  | 17.74    | 0.37  | 17.43    | 0.35  | -9.87   | 0.27  |
| GB        | -1118.42 | 46.27 | -683.68  | 12.54 | -572.15  | 40.95 | 137.41  | 17.50 |
| GBSOL     | -1093.11 | 45.84 | -665.94  | 12.40 | -554.72  | 40.72 | 127.54  | 17.49 |
| GBELE     | -2255.72 | 10.67 | -1141.47 | 6.46  | -1146.59 | 6.51  | 32.34   | 5.63  |
| GBTOT     | -648.22  | 23.48 | -278.74  | 16.18 | -282.25  | 16.28 | -87.23  | 5.76  |

STD = Standard deviation; ELE = Electrostatic energy as calculated by the Molecular Mechanics (MM) force field; VDW = Van der Waals contribution from MM; INT = Internal energy arising from bond, angle, and dihedral terms in the MM force field (this term always amounts to zero in the single trajectory approach); GAS = Total gas phase energy (sum of ELE, VDW, and INT); PBSUR/GBSUR = Non-polar contribution to the solvation free energy calculated by an empirical model; PBCAL/GB = The electrostatic contribution to the solvation free energy calculated by PB or GB, respectively; PBSOL/GBSOL = Sum of non-polar and polar contributions to solvation; PBELE/GBELE = Sum of the electrostatic solvation free energy and MM electrostatic energy; PBTOT/GBTOT = Final estimated binding free energy calculated from the terms above (kcal mol<sup>-1</sup>); DELTA = Equal to mean (complex) - [mean (ligand) + mean (receptor)]
